# Supplementary material for: Neuronal sFlt1 and Vegfaa determine venous sprouting and spinal cord vascularization
Source: PubMed Central journal article supplement (PMC5234075; doi:10.1038/ncomms13991), 2017-01-10
Supplement: ncomms13991-s1.pdf [file ncomms13991-s1.pdf]

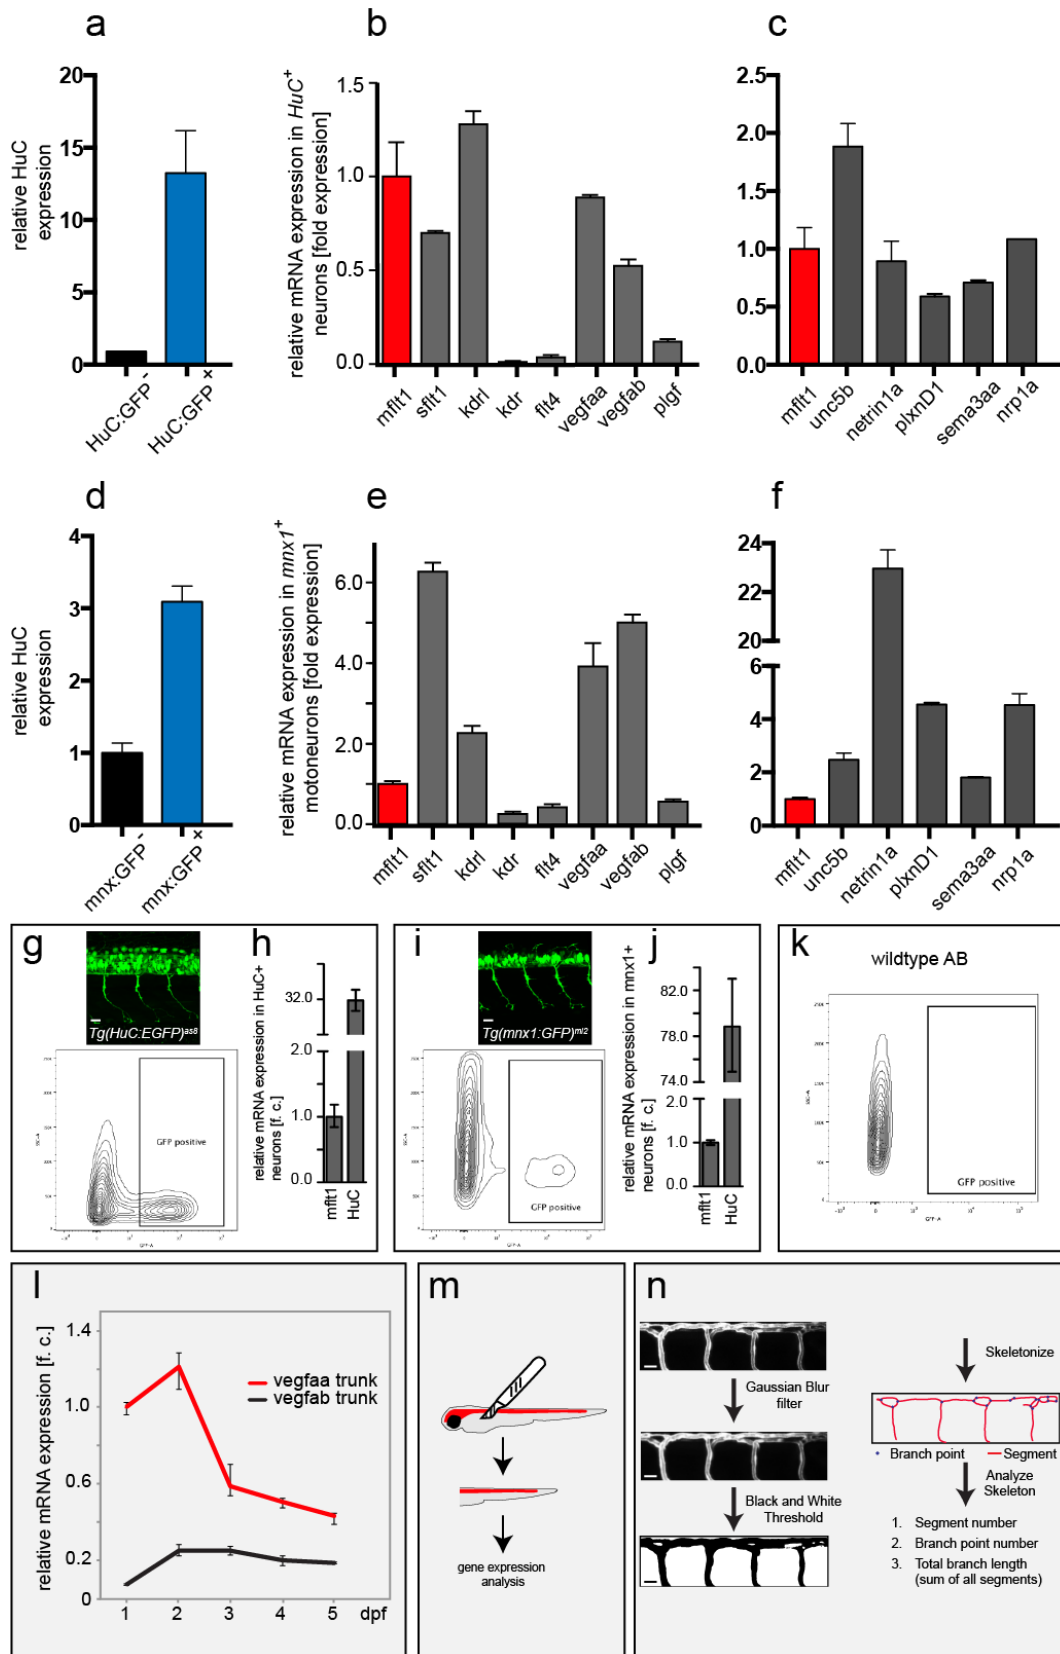

### Supplementary Figure 1 | FACS of neuronal cells

(a-f) Neuronal cells were isolated from *Tg(HuC:EGFP)<sup>as8</sup>* embryos and *Tg(mxn1:GFP)<sup>ml2</sup>* embryos at 24hpf by FACS with indicated gating settings (g-l). (a) Expression of pan-

neuronal marker HuC in the GFP positive fraction (HuC:GFP<sup>+</sup>) and GFP negative fraction (HuC:GFP<sup>-</sup>) sorted from *Tg(HuC:EGFP)<sup>as8</sup>* embryos. **(b)** Quantitative expression (TaqMan) of *mflt*, *sflt1*, *kdrl*, *kdr*, *flt4*, *vegfaa*, *vegfab*, *plgf*; **(c)** Quantitative expression (TaqMan) of *unc5b*, *netrin1a*, *plexinD1*, *semaphorin3aa*, *neuropilin-1a* in the GFP positive cell fraction FACS sorted from the pan-neuronal reporter *Tg(HuC:EGFP)<sup>as8</sup>*, mean  $\pm$  s.e.m,  $n=3$  experiments, 60 embryos/experiment. Expression levels were normalized to the expression of *mflt1* (*mflt1* expression was set at 1.0). **(d)** Expression of pan-neuronal marker HuC in the GFP positive fraction (Mnx:GFP<sup>+</sup>) and GFP negative fraction (Mnx:GFP<sup>-</sup>) sorted from *Tg(mnx1:GFP)<sup>ml2</sup>* embryos. **(e)** Quantitative expression (TaqMan) of *mflt*, *sflt1*, *kdrl*, *kdr*, *flt4*, *vegfaa*, *vegfab*, *plgf*. **(f)** Quantitative expression (TaqMan) of *unc5b*, *netrin1a*, *plexinD1*, *semaphorin3aa*, *neuropilin-1a* in the GFP positive cell fraction FAC sorted from the pan neuronal reporter *Tg(HuC:EGFP)<sup>as8</sup>*, mean  $\pm$  s.e.m,  $n=3$  experiments, 60 embryos/experiment. Expression levels were normalized to the expression of *mflt1* (*mflt1* expression was set at 1.0). **(g-k)** Gating settings for (g,h) *Tg(HuC:EGFP)<sup>as8</sup>* embryos, (i,j) *Tg(mnx1:GFP)<sup>ml2</sup>* embryos. The pictures in the inset indicate the *in vivo* expression domains of (g) *HuC* and (i) *mnx1*. Note that *HuC* marks all spinal cord neurons; *mnx1* marks only the motoneuron population. **(k)** Verification of gating settings in control embryos. **(l,m)** Tails were dissected from zebrafish embryos between 24hpf and 5dpf, RNA was isolated and used for *vegfaa* and *vegfab* real-time qPCR. **(l)** Quantitative expression of *vegfaa* and *vegfab* in the trunk of zebrafish embryos at indicated time points; mean  $\pm$  s.e.m,  $n=3$  experiments,  $n=30$  embryos/experiment. **(m)** Semi-automated vascular network analysis was performed using ImageJ with indicated plugins. Vessel segment number, branch point number and total branch length was determined. Scale bar, 25 $\mu$ m in g,i,m.

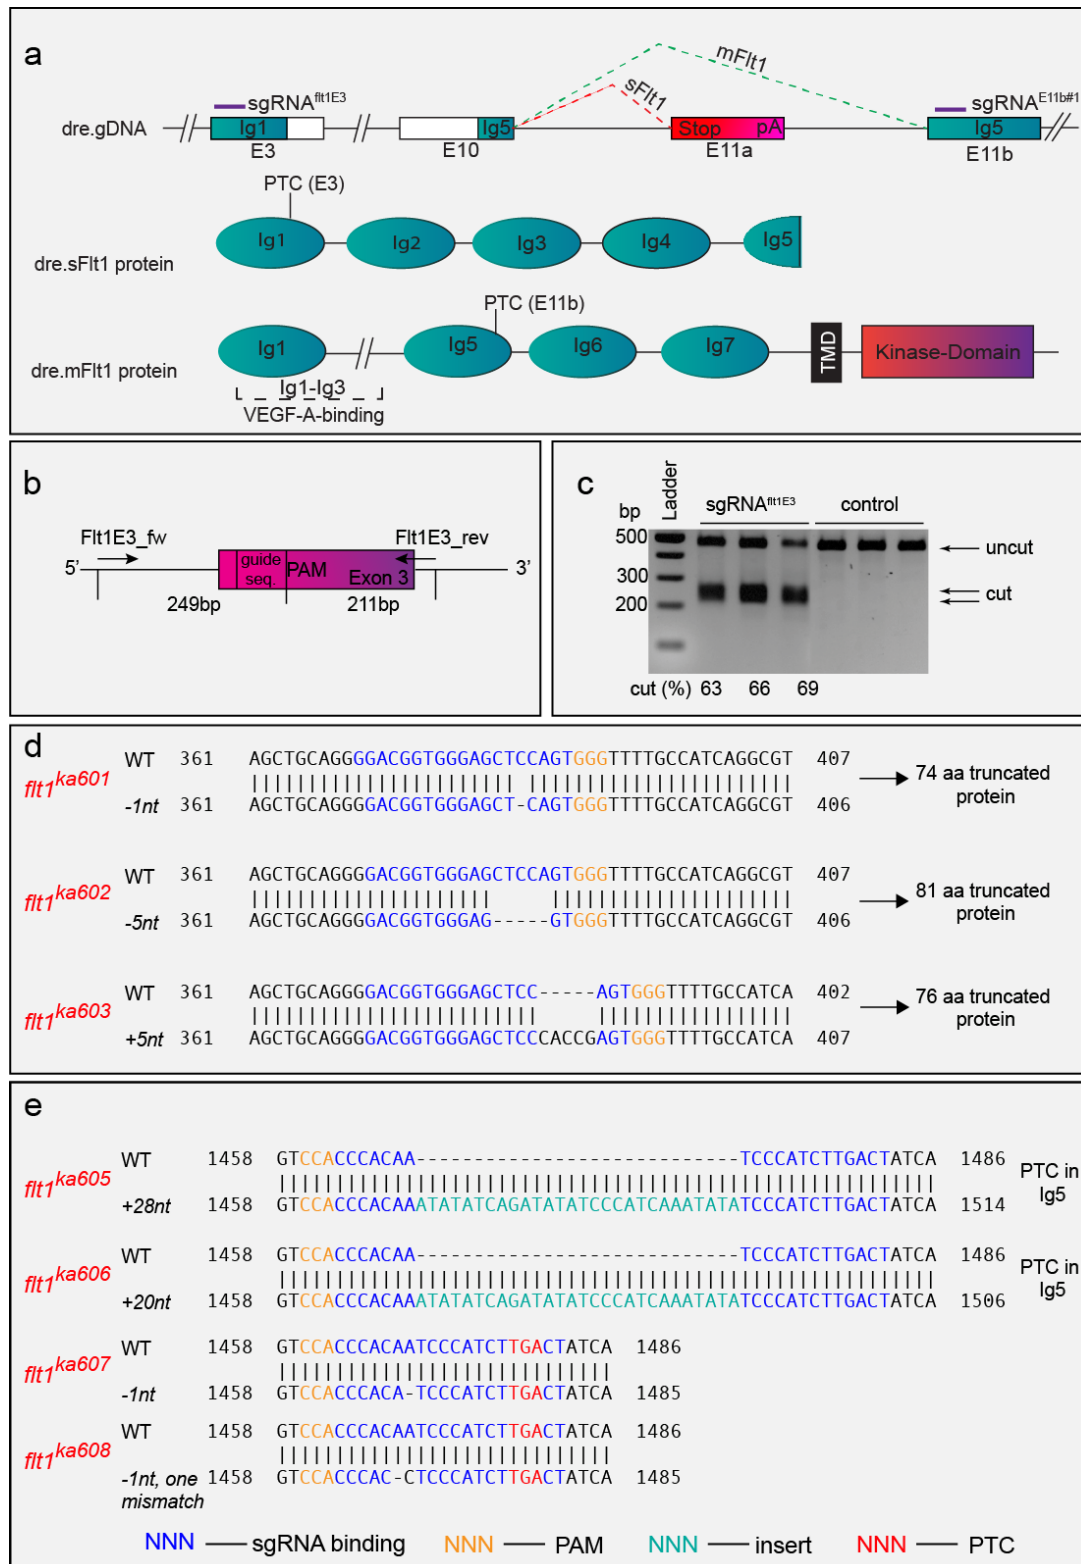

### Supplementary Figure 2 | CRISPR/Cas9 approach for generating *flt1* mutants

(a) Flt1 exon structure and splice sites for zebrafish *sflt1* and *mflt1*. Schematic protein structure and IgG domains of sFlt1 and mFlt1 for comparison. Domains targeted by sgRNA in exon 3 (full *flt1* mutants *flt1*<sup>ka601-603</sup>, targeting both *sflt1* and *mflt1*) and exon 11b (targeting only *mflt1*, *flt1*<sup>ka605-608</sup>) are indicated. (b). Position of guide sequence, Flt1 exon 3 forward and

reverse primers and expected PCR band size after T7EI cleavage. **(c)** T7EI assay and quantification of sgRNA<sup>flt1E3</sup> (targeting exon 3) efficiency **(d)** Structure and DNA sequence of *flt1*<sup>ka601</sup> (-1nt), *flt1*<sup>ka602</sup> (-5nt), *flt1*<sup>ka603</sup> (+5nt) mutant alleles. **(e)** Structure and DNA sequence of *mflt1* mutants, *flt1*<sup>ka605</sup> (+28nt), *flt1*<sup>ka606</sup> (+20nt), *flt1*<sup>ka607</sup> (-1nt), and *flt1*<sup>ka608</sup> (-1nt, one mismatch) mutant alleles. PTC, premature termination codon; PAM, protospacer adjacent motif; sgRNA, small guide RNA.

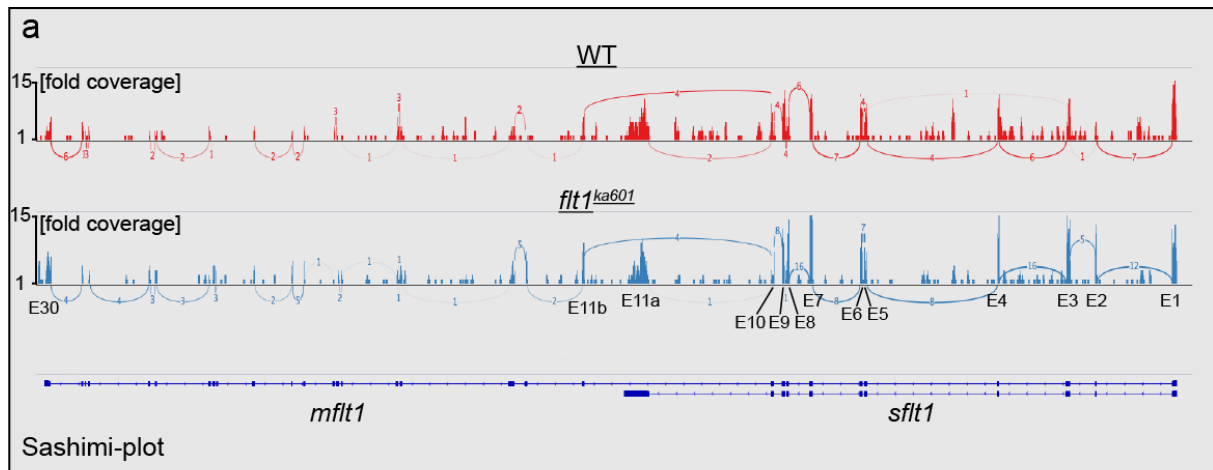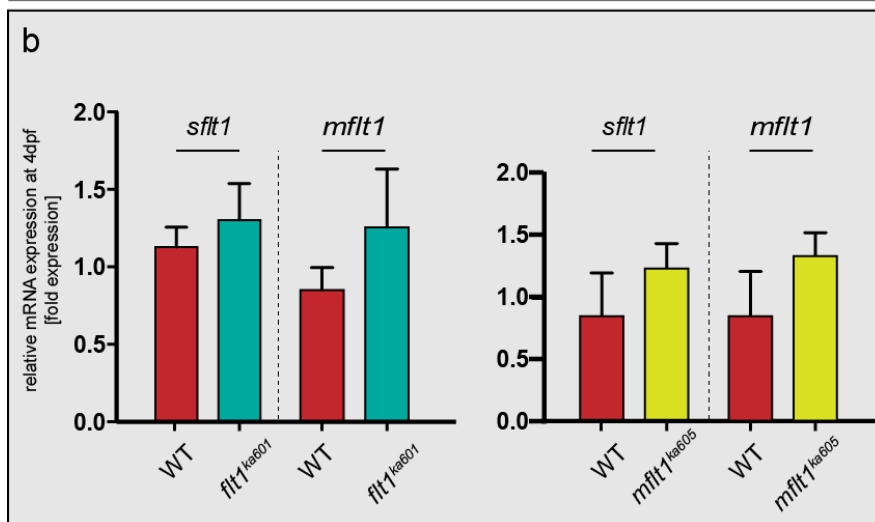

### Supplementary Figure 3 | Analysis of non-sense mediated decay in *flt1* mutants

(a) Sashimi plot based on RNA-seq data of *flt1<sup>ka601</sup>* mutant. The *sflt1* and *mflt1* intron-exon structures are indicated in the bottom panel of the graph; the number of corresponding reads for each exon (for WT in red, for *flt1<sup>ka601</sup>* mutant in blue) presented in the upper part respectively. The read numbers are indicated (fold coverage). Exon-spanning reads are indicated by the arc symbol. Note that read numbers per exon in WT and *flt1<sup>ka601</sup>* mutant are comparable. (b) PCR for *sflt1* and *mflt1* in the *flt1<sup>ka601</sup>* (full mutant, left panel) and the *flt1<sup>ka605</sup>* mutant (*mflt1* specific mutant, right panel). In both mutants we observed expression of *sflt1* and *mflt1*, at levels comparable to WT; mean  $\pm$  s.e.m, n=3 experiments.

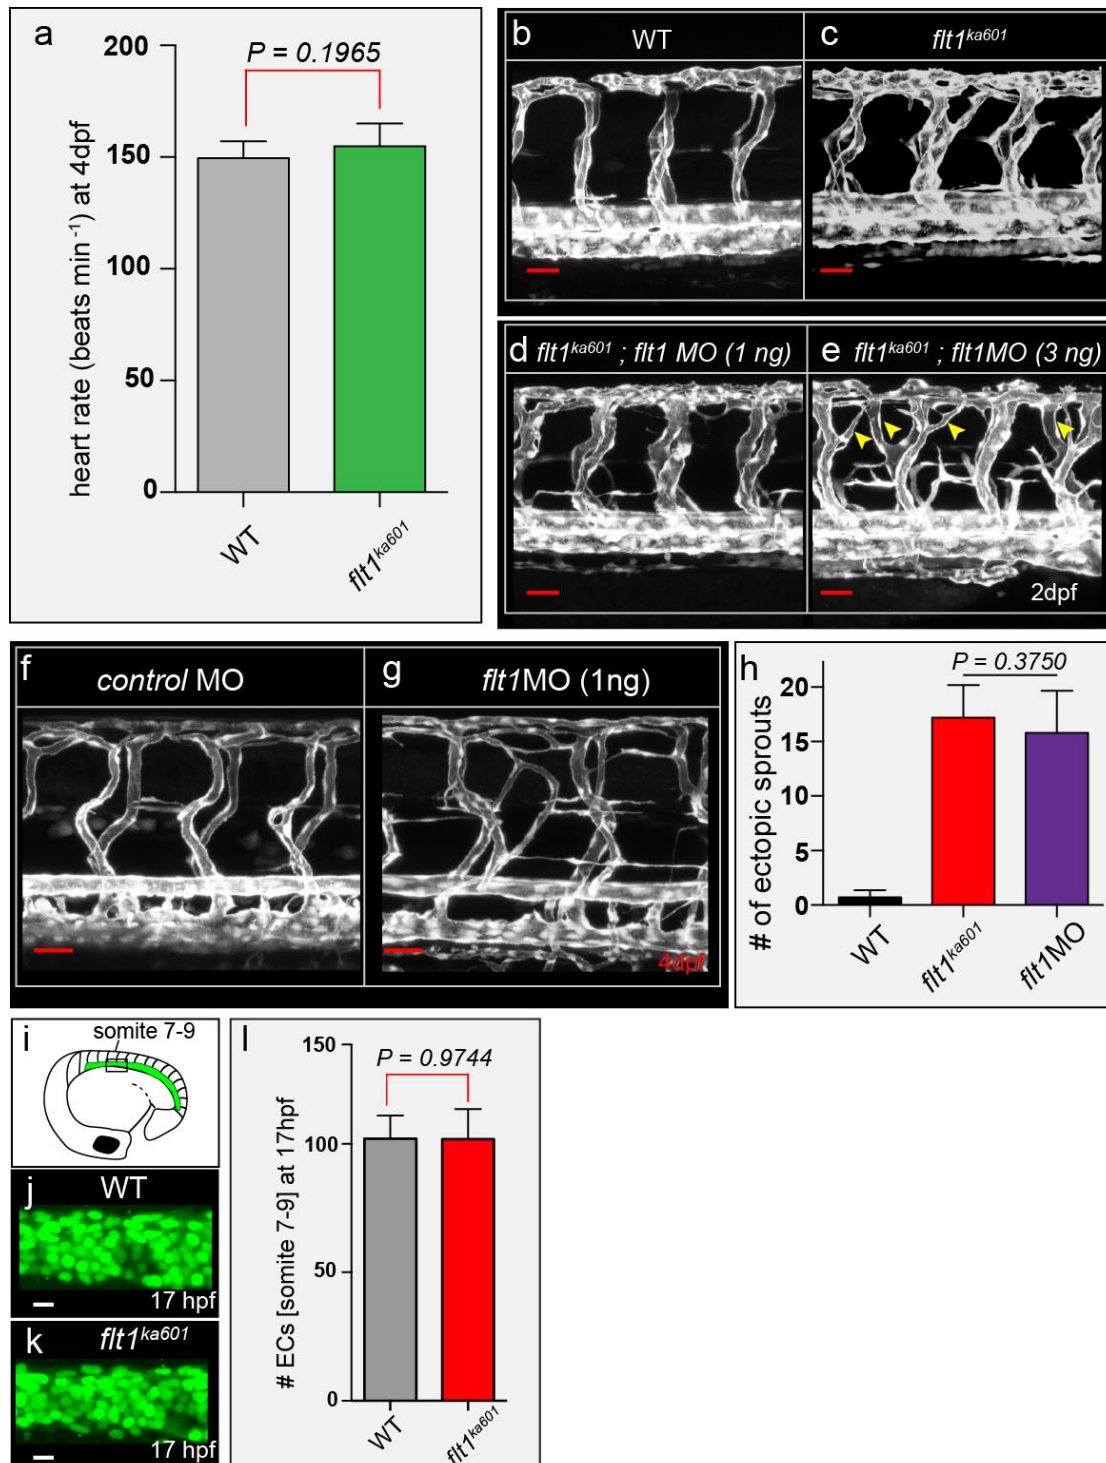

#### Supplementary Figure 4 | *Flt1* targeting morpholinos and quantification of endothelial cell numbers

(a) Heart rates in 4dpf WT and *flt1<sup>ka601</sup>*, mean  $\pm$  s.e.m,  $n=10$ . (b-e) *flt1<sup>ka601</sup>* with 1ng (d) and 3ng (e) *flt1* targeting MO injected. Note: the 3ng dosage causes arterial branching defects (arrowheads) not observed in *flt1<sup>ka601</sup>* mutants. (f,g) Vascular pattern in *Tg(kdrl:EGFP)* embryos injected with control MO (f), and 1ng *flt1* ATG targeting MO (g). (h) Quantification of

f,g; mean  $\pm$  s.e.m, n=10. Note hyper-branching equal to *flt1<sup>ka601</sup>*. **(i-k)** Imaging of endothelial nuclei in 17hpf WT and *flt1<sup>ka601</sup>* embryos. EC numbers were counted between somite 7-9 (i). **(l)** Quantification of j,k shows no difference in EC numbers. ECs were counted using ImageJ plugin 3D object counter, mean  $\pm$  s.e.m, n=4. MO, morpholino. Scale bar, 50 $\mu$ m in b-g; 10 $\mu$ m in j,k.

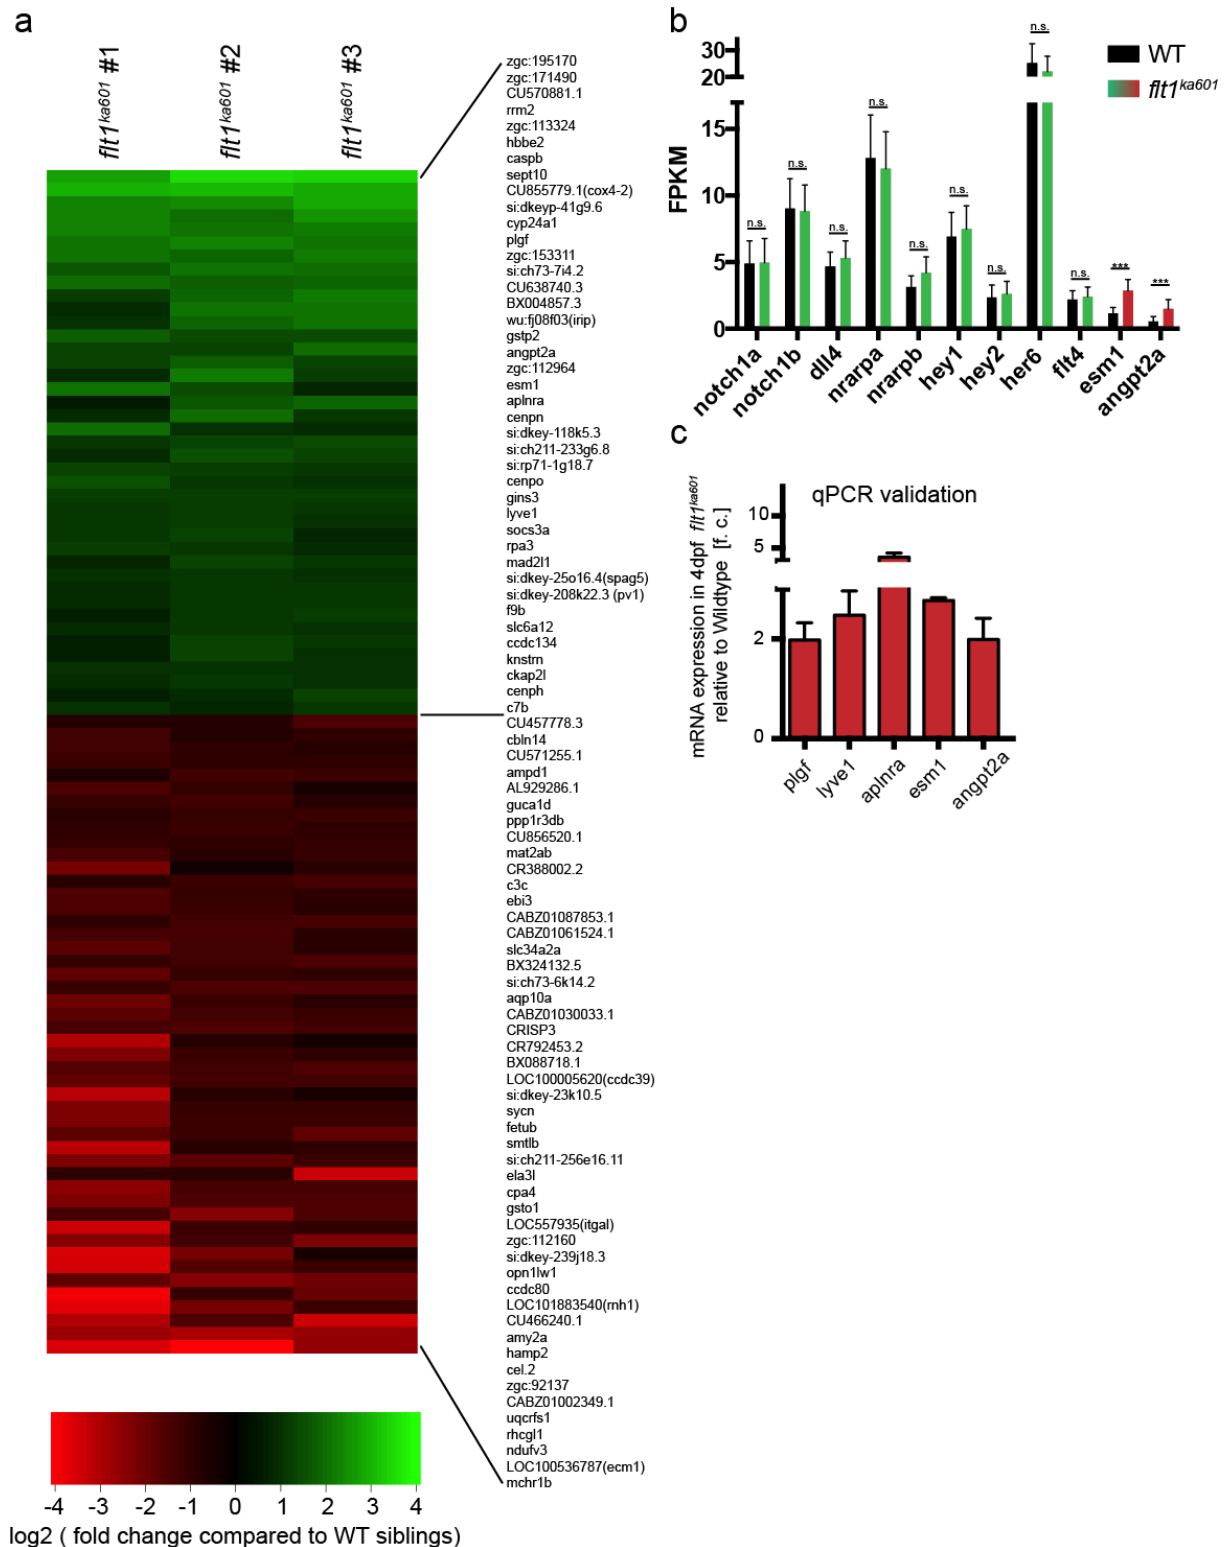



stalk cell markers *notch1*, *notch1b*, *dll4*, *nrarpa*, *nrarpb*, *hey1*, *hey2*, *her6*, *flt4*, *esm1* and *angpt2a* based on RNA-seq data in (a). Note: the Dll4-Notch signaling related genes (in green) were not deregulated but *esm1* and *angpt2a* (in red) were significantly upregulated. (c) qPCR validation of *esm1*, *angpt2a*, *aplnra*, *plgf*, and *lyve1*, identified as differentially expressed between WT and *flt1<sup>ka601</sup>* mutants in the RNA-seq analysis at 4dpf (see a, upper part heatmap, upregulated genes in green). Mean  $\pm$  s.e.m, 3 experiments, Mann Whitney U-test.

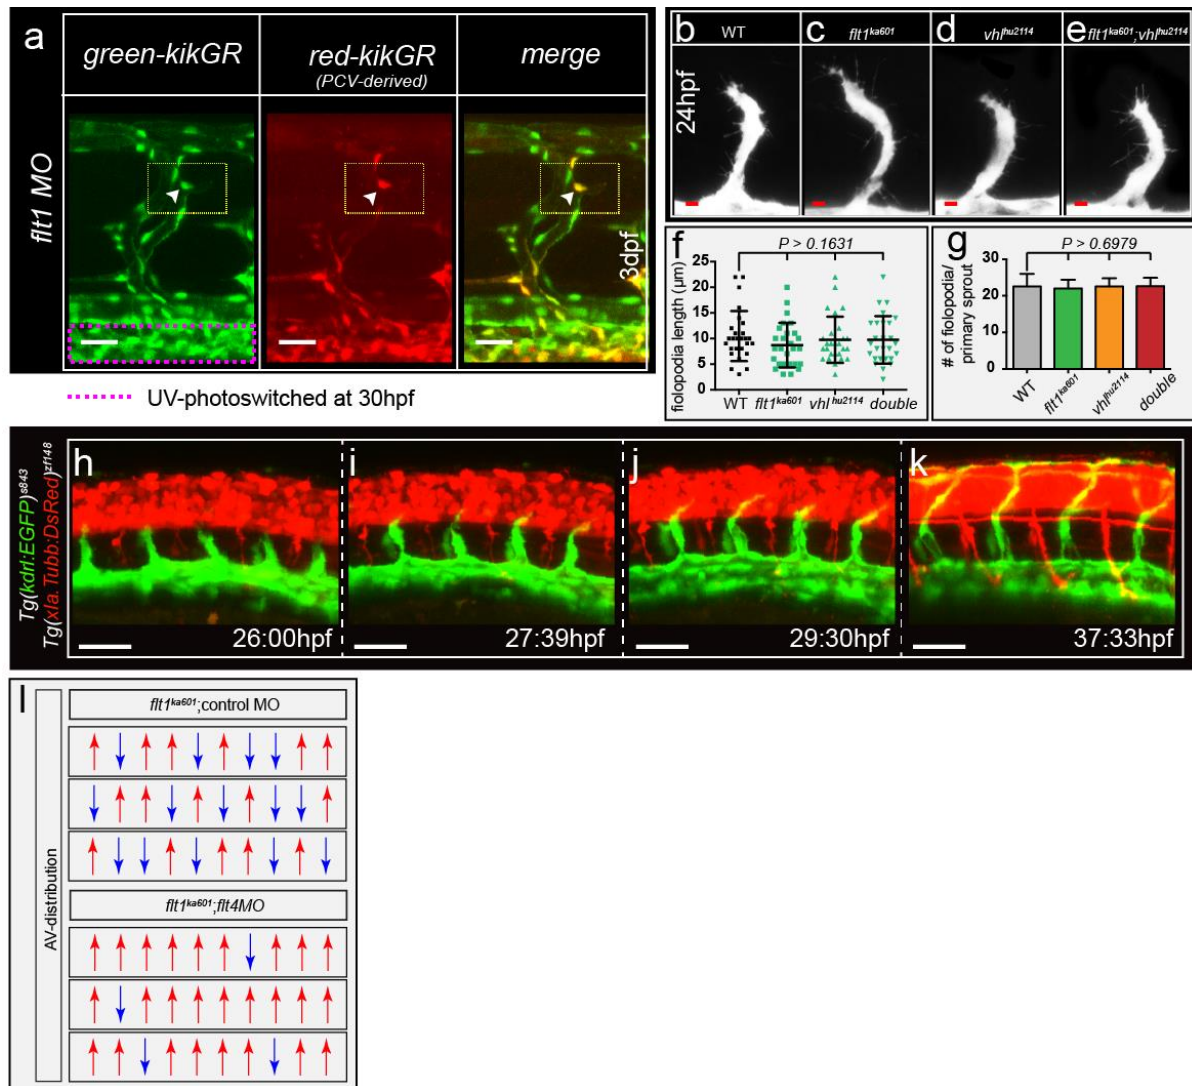

### Supplementary Figure 6 | Endothelial cell behaviors in *flt1* loss-of-function and *vegfaa* gain-of-function scenarios

**(a)** *Tg(kdr1:nlskikGR)<sup>hsc7</sup>* embryo injected with 1ng *flt1* morpholino. (left panel) Selected area in PCV (pink dotted box) was UV-photoswitched at 30hpf. (middle panel) Upon photo-conversion cells start to express the red reporter. PCV-derived cells migrate to the dorsal aspect of vISVs and contribute to venous ectopic sprouting upon loss of *flt1* at 3dpf (red cell in middle panel (arrowhead) contributes to ectopic sprouting - yellow-dotted box). (right panel) Merged image. **(b-e)** Confocal images of primary arterial segmental vessel sprouting in WT **(b)**, *flt1<sup>ka601</sup>* **(c)**, *vhl<sup>hu2114</sup>* **(d)**, and *flt1<sup>ka601</sup>;vhl<sup>hu2114</sup>* double mutants **(e)**. **(f,g)** Quantification of filopodia characteristics for indicated genotypes. Note that there are no differences in sprouting or filopodia between indicated mutants and WT, mean  $\pm$  s.e.m,  $n=27$  **(f)**, mean  $\pm$  s.e.m,  $n=9$  **(g)**, t-test. **(h-k)** Time-lapse imaging of arterial sprouting in the developing

zebrafish trunk in *Tg(kdrl:EGFP)<sup>s843</sup>*, *Tg(Xla.Tubb:DsRed)<sup>zf148</sup>* double transgenic at indicated time points. Note sprouts develop in proximity to neural tube (j,k). (I) Characterization of intersegmental blood flow characteristics in *flt1<sup>ka601</sup>* (I, top panel) and *flt1<sup>ka601</sup>* injected with *flt4* targeting morpholino (I, bottom panel). In *flt1<sup>ka601</sup>* mutant ISVs carry both arterial (red arrow up) and venous (blue arrow down) flow and the artery/vein ratio is about 1. Upon loss of *flt4*, almost all investigated ISVs carry arterial flow consistent with *flt4* blocking remodeling of arteries into veins. hpf, hours post fertilization. Scale bar, 25 $\mu$ m in a, h-k; 10 $\mu$ m in b-e.

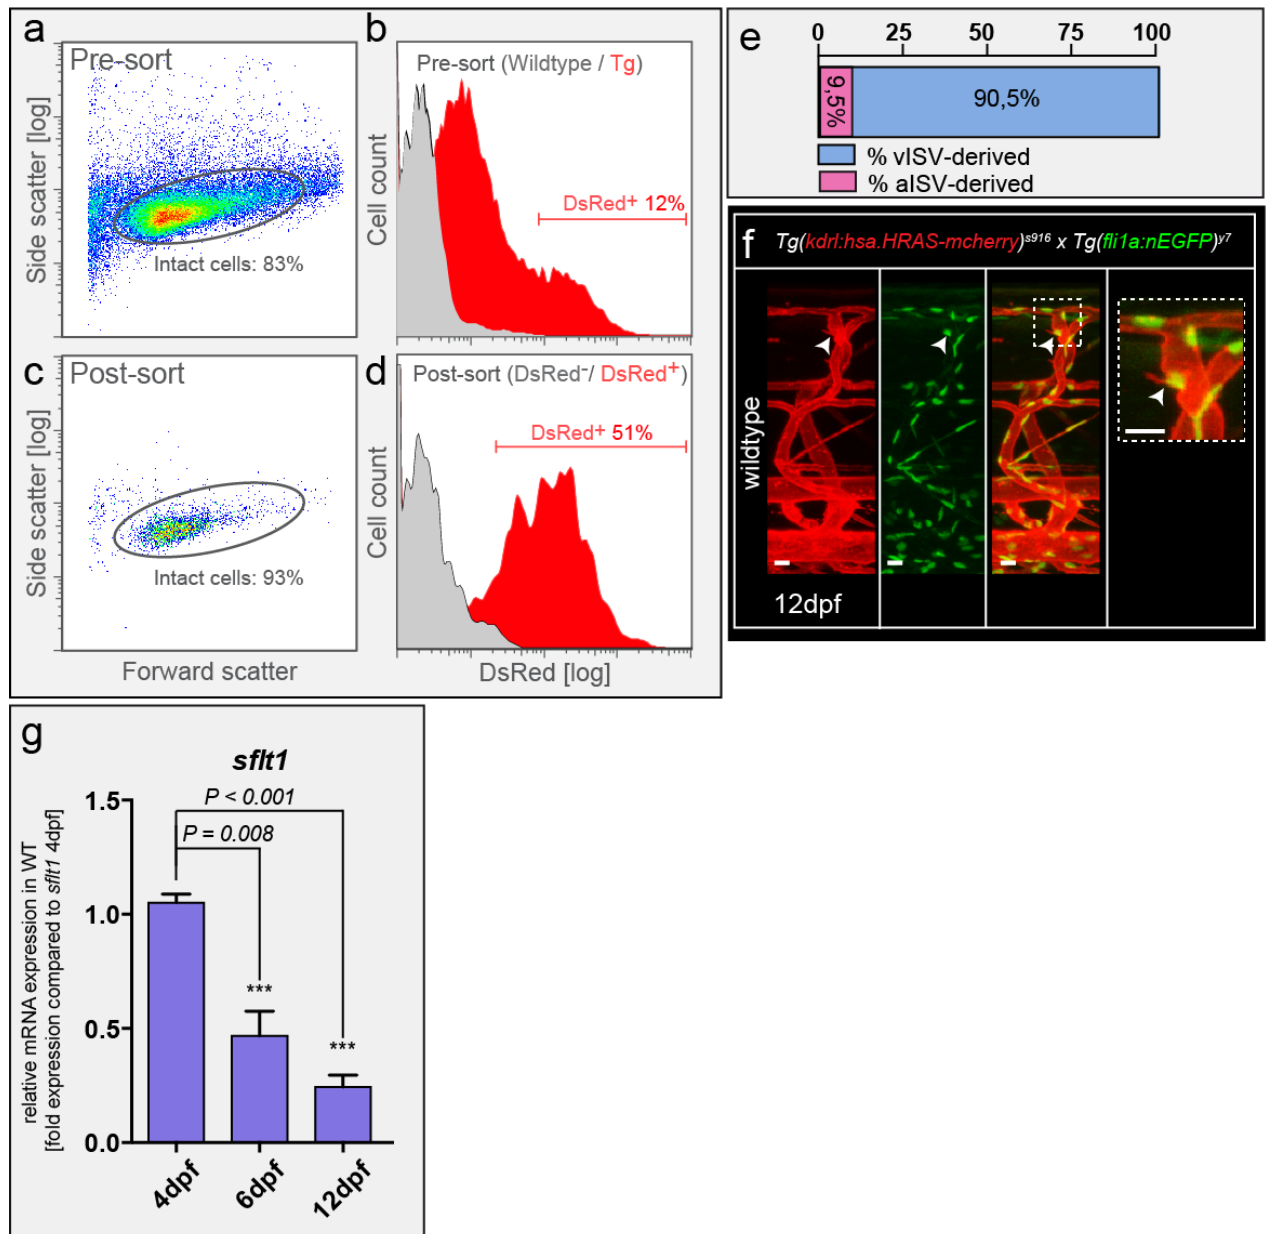

### Supplementary Figure 7 | Spinal cord vascularization in WT zebrafish

(a,b) Neuronal cells were isolated from *Tg(Xla.Tubb:DsRed)<sup>zf148</sup>* embryos at 3dpf by FACS with indicated gating settings. About 12% of all intact cells were DsRed<sup>+</sup> neurons prior to sorting (Pre-sort). (c,d) Post-sorting analysis showed that sorted neuronal cells are enriched to 51% neuronal DsRed<sup>+</sup> cells. DsRed<sup>-</sup> cells contained less than 1.7 % DsRed<sup>+</sup> cells. (e) Percentage of aISV and vISV giving rise to sprouts at level of neural tube in late stage WT embryo; 400 ISVs in n=20 embryos. (f) Nuclear positioning in sprout contributing to spinal cord vascularization in wildtype *Tg(kdr:hsa.HRAS-mcherry)<sup>sg16</sup>;Tg(fli1a:nEGFP)<sup>y7</sup>* at 12dpf;

representative image from 6 embryos (g) Quantitative PCR for *sflt1* at indicated time points. Note decreased expression of *sflt1* associates with sprout appearance and spinal cord vascularization. mean  $\pm$  s.e.m, n=3 experiments, 30 embryos/experiments dpf, days post fertilization; ISV, intersegmental vessel (a – artery, v – vein). Scale bar, 10 $\mu$ m in f.

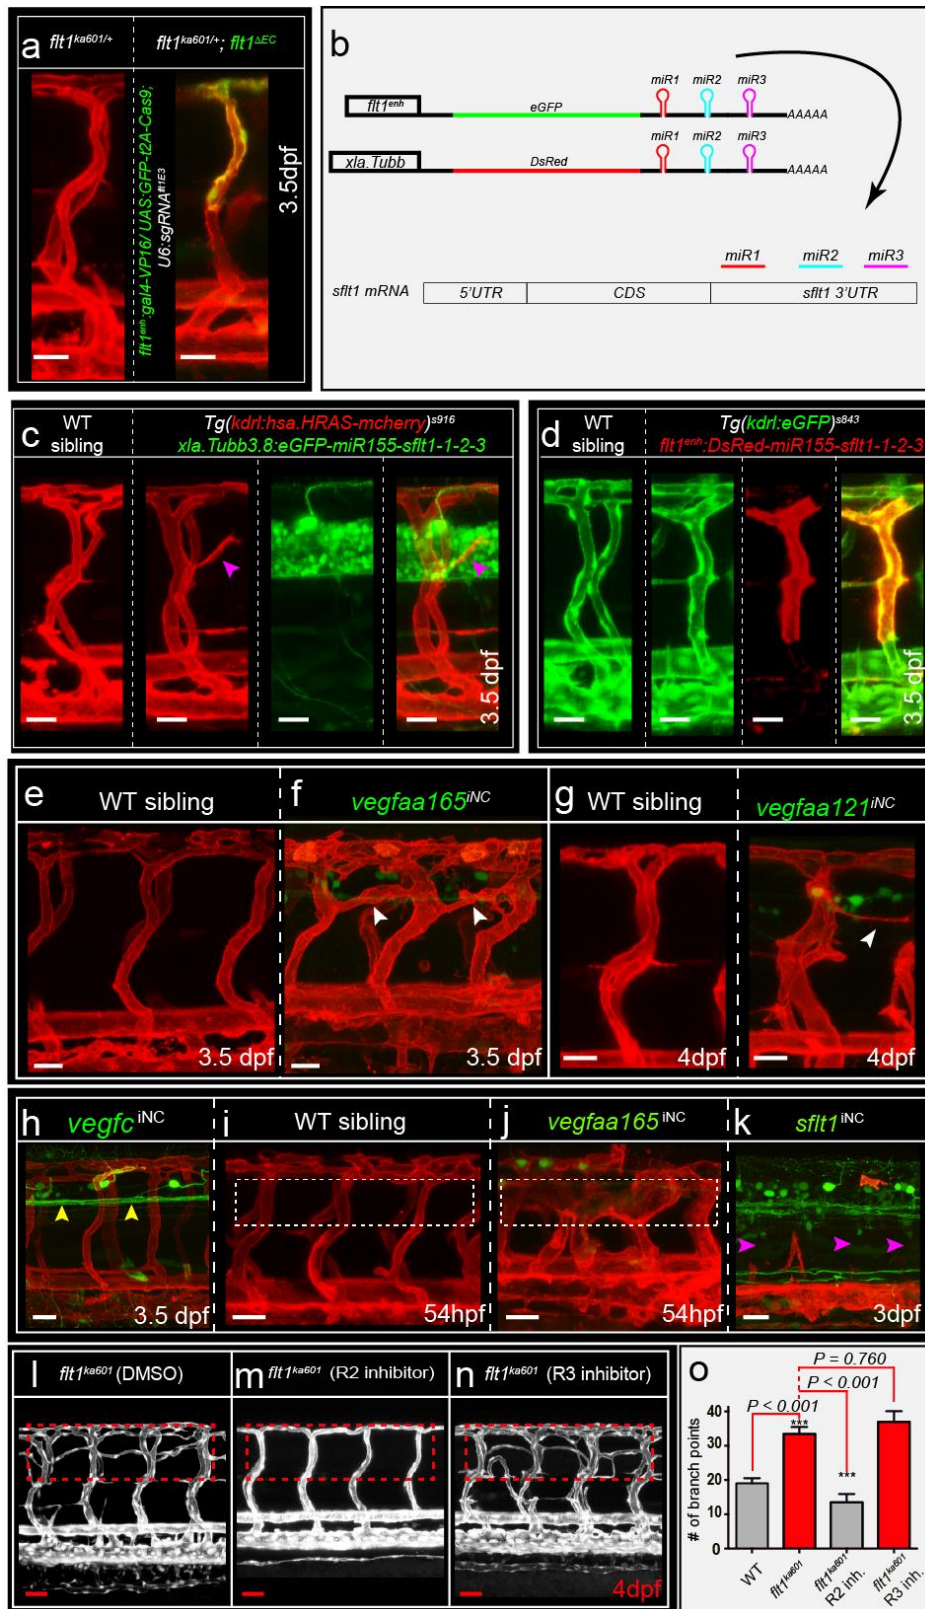

### Supplementary Figure 8 | Targeting neuronal and vascular Flt1 and Vegfaa

(a) Vascular-specific depletion of *flt1* (*flt1<sup>ΔEC</sup>*) in *flt1<sup>ka601/+</sup>* heterozygous animals does not induce ectopic venous sprouting. Embryos are in *Tg(kdr:hsa.HRAS-mcherry)<sup>s916</sup>* background. (b) Graphical illustration of multiplex miRNA construct with GFP or DsRed

reporter, using miR-155 backbone coupled to three custom made miRNAs directed against the 3'UTR of *sflt1*. (c) Neuron-specific targeting of *sflt1* with miRNA approach induced ectopic venous sprouting in WT. 9 out of 12 vISVs with high miRNA expression in the adjacent neuronal cells (in green) formed sprouts. (d) Vascular-specific targeting of *sflt1* with miRNA approach failed to induce ectopic sprouting. vISVs expressing the miRNA construct (in red) did not induce sprout formation n=21. (e,f) Endoxifen inducible neuron specific *vegfaa165* gain-of-function induced at 52hpf after AV remodeling induces hyper-branching (arrowheads). (g) Endoxifen inducible neuron specific *vegfaa121* gain-of-function induced sprouting (arrowhead). (h) Endoxifen inducible neuron specific *vegfc* gain-of-function (yellow arrowheads) induced at 52hpf does not induce ectopic sprouting at level of neural tube. (i,j) Endoxifen inducible neuron specific *vegfaa165* gain-of-function induced at 30hpf, before completion of AV differentiation induces severe thickening of ISVs and abnormal vascular remodeling; compare dotted box in (i) and (j). (k) Constitutive (non-inducible) neuron-specific *sflt1* gain-of-function blocked ISV development; most ISVs were missing (arrowheads). (l-n) *Flt1<sup>ka601</sup>* mutant treated with DMSO (l); treated with KdrI receptor signaling inhibitor ki8751 (m, R2 inhibitor); treated with Flt4 tyrosine kinase inhibitor MAZ51 (n, R3 inhibitor). (o) Quantification of l-n. Mean  $\pm$  s.e.m, n=11/group, t-test. iNC, inducible, neuronal cell specific gain-of-function; R2, VEGF receptor 2; R3, VEGF receptor 3. miR, microRNA. Scale bar, 25 $\mu$ m in a, c-n.

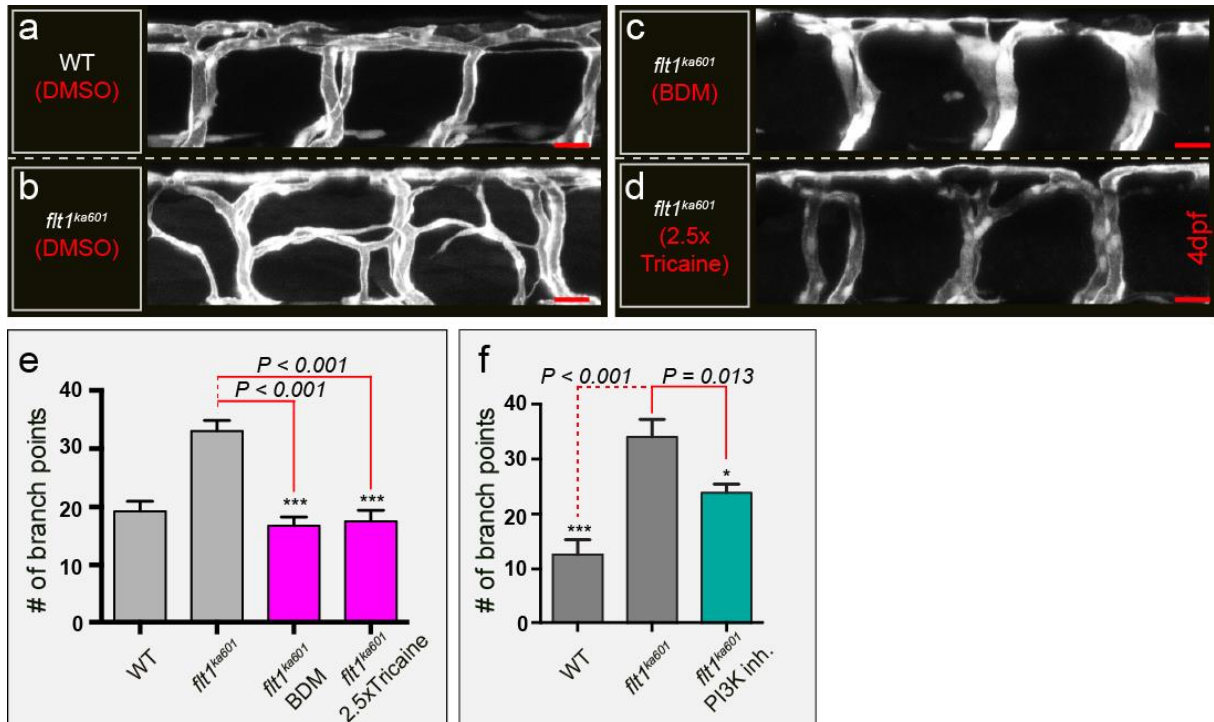

### Supplementary Figure 9 | Ectopic venous sprouting requires hemodynamic factors and Akt

(a-d) Loss of hemodynamics rescues hyper-branching in *flt1<sup>ka601</sup>* mutants. (a) WT treated with DMSO; (b) *flt1<sup>ka601</sup>* treated with DMSO; (c) inhibition of cardiac activity with 2,3-Butanedione monoxime (BDM) in *flt1<sup>ka601</sup>* (d) *flt1<sup>ka601</sup>* exposed to 2.5X tricaine. mean  $\pm$  s.e.m, 20-25 embryos/group, Mann Whitney U test. (e) Quantification of a-d. Note that inhibiting blood flow with BDM or tricaine inhibited ectopic branching. (f) Vascular branching after blockade of PI3 kinase with wortmannin. mean  $\pm$  s.e.m, 3 experiments, 15-18 embryos/group, Mann Whitney U test. Scale bar, 20 $\mu$ m in a-d.



**Supplementary Table 1 | Real-time qPCR and Taqman primer sequences**

| <b>gene</b> | <b>name</b>       | <b>forward primer</b>           | <b>reverse primer</b>                |
|-------------|-------------------|---------------------------------|--------------------------------------|
| vegfaa      | zvegfaa-E4-E5     | 5'-CAACGCGTATCGCAGCATAA-3'      | 5'-TGCCTTTGGCCTGCATTC-3'             |
| vegfab      | zvegfab-E3-E4     | 5'-TGCTGGGTGCTGCAATGAT-3'       | 5'-CTCTTAATCTCCAAGGTAATGTTGTATGTG-3' |
| ef1a        | zef1a-E4-E5       | 5'-GTTGCCTTCGTCCCAATTTC-3'      | 5'-CAATCTTCCATCCCTTGAACCA-3'         |
| mflt1       | zflt1-E19         | 5'-GTGAACACAAGGCTCTAATGACAGA-3' | 5'-TGCGCCGAGGAGATTGAC-3'             |
| sflt        | z-sflt-E11a       | 5'-TCCGTCCCAATTTACCATTC-3'      | 5'-TCTTGGGTGGCTGGATGAG-3'            |
| plgf        | z-plgf-E4-E6      | 5'-CACAAAGCCTGTGAATGTAGACT-3'   | 5'-TTCTCCTTCCTTTTTCTCCCTCTAT-3'      |
| kdrl        | zkdrl-E6-E7       | 5'-CAATGGCAGGATTCACTTTGAG-3'    | 5'-GACCGGTGTGGTGCTAAAATG-3'          |
| kdr         | zKdr-E12-E13      | 5'-ACAGGTGCATCGCTACCAATAA-3'    | 5'-GGACGCTTAGGTTGAGAAAAAG-3'         |
| lyve1a      | zlyve1a_E4/5-E5/6 | 5'-GGCTCCACTGAAGCTGTTCC-3'      | 5'-GCCTTGCAGGGTCTTTTCGT-3'           |
| angpt2a     | zanpt2a-E4/5-E6   | 5'-TGTGACAAGGCAAGGTAGCAA-3'     | 5'-GTCCCCATGTCACAGTAGGC-3'           |
| aplra       | zaplnra_E1        | 5'-GGACAAAACCTCTGGGGGTGAA-3'    | 5'-ACACTCGCATCCACTCATCG-3'           |
| esm1        | zesm1_E2-E2/3     | 5'-TTGTGACAGAGAAACCGGCG-3'      | 5'-AACCCACTTCATTACCTGCTTCA-3'        |
| hbbe2       | zhbbe1_E1/2-E2    | 5'-ACTGCAGAGGGCTTTGATTGT-3'     | 5'-TGGCCTCAGCATTGTACAGG-3'           |

**Supplementary Table 2 | Taqman probes**

| gene       | name          | taqman probe                                         |
|------------|---------------|------------------------------------------------------|
| vegfa<br>a | zvegfaa-E4-E5 | FAM-5'-TCAGCTGAGTTTCACAGAACACACCAAGTG -3'-TAMRA      |
| vegfa<br>b | zvegfab-E3-E4 | FAM-5'- AAATGATGGAATGCACCCCCACC -3'-TAMRA            |
| ef1a       | zef1a-E4-E5   | FAM-5'-ATGTTTGAGCTGGCCTCCAGCATGTT-3'-TAMRA           |
| mflt1      | zflt1-E19     | FAM-5'-TGAAGATTCTCAATCATATAGGTCACCACATCAATG-3'-TAMRA |
| sflt       | z-sflt-3'UTR  | FAM-5'-TCTCTCACCTGTCAAATAACCCAACAACCG-3'-TAMRA       |
| plgf       | z-plgf-E4-E6  | FAM-5'-ACCTACAACAAAACAAGACAGATGGAAACCCAGA-3'-TAMRA   |
| kdr1       | zkdr1-E6-E7   | FAM-5'-AGTTTCATAAGGAGCGGATCAATCG-3'-TAMRA            |
| kdr        | zKdr-E12-E13  | FAM-5'-GTTACTTGAAACACAATGACTCGCTG-3'-TAMRA           |

**Supplementary Table 3 | Taqman ABI primer mixes**

| gene          | ABI primer mix |
|---------------|----------------|
| vegfc         | Dr03146062_g1  |
| elav13 (HuC)  | Dr03131532_m1  |
| flt4          | Dr03138041_g1  |
| Unc55 (Unc5b) | Dr03430563_m1  |
| Netrin1a      | Dr03073979_m1  |
| Semaphorin3aa | Dr03105514_m1  |
| PlexinD1      | Dr03203243_s1  |
| Neuropilin1a  | Dr03106127_m1  |

**Supplementary Table 4 | sgRNA sequences**

| sgRNA sequence (without PAM)                 |
|----------------------------------------------|
| sgRNAflt1E3: 5'-GGGACGGTGGGAGCTCCAGT-3'      |
| sgRNAflt1E5: 5'-GGAATATCATCTGGAACAGC-3'      |
| sgRNAflt1E11#1: 5'-GGCAGTCCAGGACGAAGGAGG-3'  |
| sgRNAflt1E11#2: 5'-GGTGATGGTCAAGATGGGATTG-3' |
| sgRNAflt1E11#3: 5'-GGTCAAGATGGGATTGTGGG-3'   |
| sgRNAflt1E11#4: 5'-GGAGAAGCCTCCTCCTTCGTCC-3' |
| sgRNAflt1E11#5: 5'-GGATGGTCAAGATGGGATTGT-3'  |

**Supplementary Table 5 | sgRNA oligos for oligo-cloning into DR274**

| <b>oligo1</b>                                          | <b>oligo2</b>                                          |
|--------------------------------------------------------|--------------------------------------------------------|
| Flt1_E3_sgRNA_1+: 5'-<br>TAGGGACGGTGGGAGCTCCAGT-3'     | Flt1_E3_sgRNA_1-: 5'-<br>AAACACTGGAGCTCCCACCGTC-3'     |
| Flt1_E5_sgRNA_1+: 5'-<br>TAGGAATATCATCTGGAACAGC-3'     | Flt1_E5_sgRNA_1-: 5'-<br>AAACGCTGTTCCAGATGATATT-3'     |
| Flt1_E11b_sgRNA_1+:5'-<br>TAGGCAGTCCAGGACGAAGGAGG-3'   | Flt1_E11b_sgRNA_1-: 5'-<br>AAACCCTCCTTCGTCCTGGACTG-3'  |
| Flt1_E11b_sgRNA_2+:5'-<br>TAGGTGATGGTCAAGATGGGATTG-3'  | Flt1_E11b_sgRNA_2-: 5'-<br>AAACCAATCCCATCTTGACCATCA-3' |
| Flt1_E11b_sgRNA_3+: 5'-<br>TAGGTCAAGATGGGATTGTGGG-3'   | Flt1_E11b_sgRNA_3-: 5'-<br>AAACCCACAATCCCATCTTGA-3'    |
| Flt1_E11b_sgRNA_4+: 5'-<br>TAGGAGAAGCCTCCTCCTTCGTCC-3' | Flt1_E11b_sgRNA_4-: 5'-<br>AAACGGACGAAGGAGGAGGCTTCT-3' |
| Flt1_E11b_sgRNA_5+: 5'-<br>TAGGATGGTCAAGATGGGATTGT-3'  | Flt1_E11b_sgRNA_5-: 5'-<br>AAACACAATCCCATCTTGACCAT-3'  |

**Supplementary Table 6 | Primer sequences used for cloning and genotyping**

| <b>primer name</b>   | <b>primer sequence</b>                                                      |
|----------------------|-----------------------------------------------------------------------------|
| pME_GFP_p2A_fw       | 5'-<br>GCAGGAGACGTGGAGGAGAACCCTGGACCCGGGGAATTCAAG<br>GCCTCTCGAGCCTCTAGAT-3' |
| pME_GFP_p2A_rev      | 5'-<br>TTGCTTTAACAGAGAGAAGTTAGTAGCTCCGCTTCCTGAATTCC<br>CAGATCTTCCACCGCC-3'  |
| vegfc_p2A_fw         | 5'-ATCAGCGCTCACTTATTTGGATTTTCTGTC-3'                                        |
| vegfc_p2A_rev        | 5'-AGTCTCGAGTTAGTCCAGTCTTCCCCAGTATGTG-3'                                    |
| sflt1_p2A_fw         | 5'-ATGTTTCGATATATTATTTGTGATGATATTTGG-3'                                     |
| sflt1_p2A_rev        | 5'-AAGTCTCGAGTCAGGCCAGCCGCGCCGGG-3'                                         |
| Vegfaa_p2A_fw        | 5'-AACTTGGTTGTTTATTTGATACAGTTATTTCTCGC-3'                                   |
| Vegfaa_p2A_rev       | 5'-AGTCTCGAGTCATCTTGGCTTTTCACATCT-3'                                        |
| U6_flt1E3_1          | 5'-GGGACGGTGGGAGCTCCAGTGT-3'                                                |
| U6_flt1E3_2          | 5'-ACTGGAGCTCCCACCGTCCCGA-3'                                                |
| Flt1_E3_gDNA_f       | 5'-CAGCTCAACACACACAGTATTGTTTTA-3'                                           |
| Flt1_E3_gDNA_r       | 5'-ACACCTGAAGCATCTTACCTGTGA-3'                                              |
| Flt1E11A238<br>6576F | 5'-ATTCCCAAGAGACCTGAAATCGGAA-3'                                             |
| Flt1E11A238<br>6151R | 5'-GCTTGATTGCAGTTATCTTGAGGCA-3'                                             |

**Supplementary Table 7 | miRNA155 sflt1-3'UTR specific target sites**

| target site   | sequence (mmu miR-155 loop in red)                                         |
|---------------|----------------------------------------------------------------------------|
| sflt1 3'UTR-1 | 5'-<br>TGAAGACGGAGGGACAATCACGTTTTGGCCACTGACTGACGTGATTGTCTCCGTCTT<br>CA-3'  |
| sflt1 3'UTR-2 | 5'-<br>AATAGATCAAGCTCCTGAGGA GTTTTGGCCACTGACTGACTCCTCAGGCTTGATCTAT<br>T-3' |
| sflt1 3'UTR-3 | 5'-<br>TAGAGATTGAGGCTTGGTTCA GTTTTGGCCACTGACTGACTGAACCAACTCAATCTCT<br>A-3' |
